# Supplementary material for: Theoretically elucidating high photoluminescence performance of dimethylacridan-based blue-color thermally activated delayed fluorescent materials
Source: Royal Society of Chemistry journal article supplement (doi:10.1039/d1nj05251a), 2022-01-01
Supplement: d1nj05251a1.pdf [file d1nj05251a1.pdf]

# Theoretically elucidating high photoluminescence performance of dimethylacridan-based blue-color thermally activated delayed fluorescent materials

Zhuangzhuang Wei<sup>1,2,3</sup>, Tao Zuo<sup>2,3</sup>, Shanshan Jiang<sup>2,3</sup>, Fangfang Qi<sup>1,2,3</sup>, Mingxue Yang<sup>2,3</sup>, Lingyi Meng<sup>\*1,2,3</sup> and Can-Zhong Lu<sup>\*1,2,3,4</sup>

1. College of Chemistry and Materials Science, Fujian Normal University, Fuzhou, Fujian 350007, P. R. China.
2. CAS Key Laboratory of Design and Assembly of Functional Nanostructures, and Fujian Provincial Key Laboratory of Nanomaterials, Fujian Institute of Research on the Structure of Matter, Chinese Academy of Sciences, Fuzhou, Fujian 350002, P. R. China.
3. Xiamen Key Laboratory of Rare Earth Photoelectric Functional Materials, Xiamen Institute of Rare Earth Materials, Haixi Institutes, Chinese Academy of Sciences, Xiamen 361021, P. R. China
4. University of Chinese Academy of Sciences, Beijing 100049, P. R. China

\*Corresponding authors. E-mail: lymeng@fjirsm.ac.cn (L. Meng) and czlu@fjirsm.ac.cn (C. Lu)

The Marcus–Levich equation<sup>1</sup> can be expressed as:

$$k = \frac{1}{\hbar^2} |\xi_{if}|^2 \sqrt{\frac{\pi}{\lambda_{reorg} k_B T}} \exp \left[ -\frac{(\Delta E_{if} - \lambda_{reorg})^2}{4\lambda_{reorg} k_B T} \right] \quad (S1)$$

where  $\xi_{if}$  is the spin-orbit coupling constant.  $\lambda_{reorg}$  is the reorganization energy.  $\Delta E_{if}$  is the energy gap between initial and final electronic states.

**Table S1.** Calculated the intersystem crossing rates and reverse intersystem crossing rates ( $K_{ISC}$ ,  $K_{RISC}$ ) with the calculated and experimental  $\Delta E_{ST}$ . We also list the experimental value (doped film)<sup>2, 3</sup> for a comparison.

|                                       | $K_{ISC}$<br>( $\times 10^6 s^{-1}$ ) | $K_{RISC}$<br>( $\times 10^6 s^{-1}$ ) |
|---------------------------------------|---------------------------------------|----------------------------------------|
| AC-OSO (Cal. $\Delta E_{ST}=0.03eV$ ) | 498                                   | 658                                    |
| AC-OSO (Exp. $\Delta E_{ST}=0.06eV$ ) | 198                                   | 82.5                                   |
| AC-OSO (exp.)                         | 7.00                                  | 0.81                                   |
| ACRXTN (Cal. $\Delta E_{ST}=0.02eV$ ) | 3.45                                  | 4.08                                   |
| ACRXTN (Exp. $\Delta E_{ST}=0.06eV$ ) | 1.02                                  | 0.26                                   |
| ACRXTN (exp.)                         | 20.0                                  | 0.46                                   |

### Coordinates (unit: Å)

AC-OSO-S<sub>0</sub>

|   |            |             |            |
|---|------------|-------------|------------|
| C | 3.92108700 | -1.31117800 | 2.77268100 |
| C | 2.76914500 | -1.96657100 | 3.19925000 |

|   |             |             |             |
|---|-------------|-------------|-------------|
| C | 1.55327100  | -1.88931900 | 2.50684100  |
| C | 1.51301800  | -1.10964900 | 1.33281400  |
| C | 2.67724900  | -0.44657800 | 0.89658400  |
| C | 3.86654900  | -0.54670500 | 1.60869200  |
| C | 0.33297900  | -2.64799000 | 3.04352700  |
| C | -0.89548300 | -2.43768100 | 2.14925500  |
| C | -0.86680500 | -1.64146400 | 0.98556600  |
| N | 0.31928100  | -0.99034700 | 0.59225300  |
| C | -2.10560900 | -3.05738500 | 2.48824200  |
| C | -3.26291900 | -2.91635700 | 1.72713300  |
| C | -3.21931600 | -2.12626100 | 0.57988500  |
| C | -2.03638500 | -1.49535700 | 0.21335000  |
| C | 0.01007700  | -2.14129000 | 4.47560900  |
| C | 0.66472000  | -4.16414200 | 3.09903900  |
| C | 0.31978400  | -0.19936700 | -0.60185800 |
| C | 0.02050500  | 1.15948500  | -0.52513900 |
| C | 0.02549900  | 1.93634000  | -1.68624500 |
| C | 0.33986900  | 1.34546500  | -2.91571300 |
| C | 0.61419600  | -0.02405300 | -2.99221000 |

|   |             |             |             |
|---|-------------|-------------|-------------|
| C | 0.60627300  | -0.79730700 | -1.83873500 |
| O | -0.30524800 | 3.25744900  | -1.53100600 |
| C | -0.77233600 | 4.01055800  | -2.58193000 |
| C | -0.55725300 | 3.69487100  | -3.92847600 |
| S | 0.53447600  | 2.36260300  | -4.35992500 |
| C | -1.51861200 | 5.14242700  | -2.24516300 |
| C | -2.04833900 | 5.93912600  | -3.25447800 |
| C | -1.85715200 | 5.61104800  | -4.60273100 |
| C | -1.11183900 | 4.48766300  | -4.93960400 |
| O | 1.91877200  | 2.86941700  | -4.39525900 |
| O | 0.01934500  | 1.65340900  | -5.54306400 |
| H | 4.84233500  | -1.39862500 | 3.33972400  |
| H | 2.81656900  | -2.56227600 | 4.10557300  |
| H | 2.65168900  | 0.15041300  | -0.00601900 |
| H | 4.74733900  | -0.02428300 | 1.24736500  |
| H | -2.14350400 | -3.67357900 | 3.38112800  |
| H | -4.17924600 | -3.41499700 | 2.02640700  |
| H | -4.10410000 | -1.99551800 | -0.03615400 |
| H | -2.01859900 | -0.88411400 | -0.67987100 |

|   |             |             |             |
|---|-------------|-------------|-------------|
| H | -0.22682900 | -1.07344600 | 4.46365600  |
| H | -0.84618500 | -2.67472700 | 4.89843100  |
| H | 0.85932800  | -2.29358200 | 5.14793800  |
| H | -0.17815600 | -4.73731300 | 3.49597400  |
| H | 0.89540600  | -4.54620000 | 2.10037700  |
| H | 1.52769600  | -4.35434400 | 3.74356600  |
| H | -0.22727800 | 1.62086100  | 0.42382900  |
| H | 0.83493700  | -0.46526600 | -3.95814600 |
| H | 0.82330800  | -1.85859900 | -1.88023900 |
| H | -1.67929200 | 5.36756800  | -1.19667900 |
| H | -2.62918100 | 6.81613300  | -2.98752900 |
| H | -2.28640100 | 6.23022300  | -5.38282100 |
| H | -0.94863900 | 4.21081600  | -5.97568700 |

AC-OSO-S<sub>1</sub>

|   |            |             |            |
|---|------------|-------------|------------|
| C | 3.89321500 | -1.26045800 | 2.63086000 |
| C | 2.78530400 | -1.95115300 | 3.11988200 |
| C | 1.54456000 | -1.90303200 | 2.48313100 |

|   |             |             |             |
|---|-------------|-------------|-------------|
| C | 1.43897400  | -1.12132500 | 1.29907100  |
| C | 2.56913300  | -0.41717800 | 0.80542700  |
| C | 3.77840900  | -0.48858800 | 1.46704800  |
| C | 0.36462100  | -2.67493100 | 3.05660700  |
| C | -0.89277500 | -2.48148200 | 2.22072700  |
| C | -0.90916400 | -1.67973200 | 1.04647700  |
| N | 0.23849400  | -1.02920000 | 0.60446100  |
| C | -2.08272700 | -3.10796200 | 2.59480300  |
| C | -3.25728700 | -2.96177500 | 1.85885600  |
| C | -3.26431300 | -2.16700900 | 0.70506700  |
| C | -2.10681300 | -1.53344500 | 0.29928900  |
| C | 0.09000900  | -2.17644600 | 4.50610500  |
| C | 0.72168400  | -4.19066300 | 3.08844700  |
| C | 0.18007500  | -0.23307800 | -0.60955600 |
| C | -0.15279500 | 1.15891200  | -0.51659700 |
| C | -0.10016200 | 1.92392600  | -1.65509800 |
| C | 0.23190500  | 1.36683500  | -2.92771700 |
| C | 0.51082900  | -0.04948400 | -2.99682500 |
| C | 0.49180400  | -0.81822400 | -1.85686100 |

|   |             |             |             |
|---|-------------|-------------|-------------|
| O | -0.43659300 | 3.26318300  | -1.50872600 |
| C | -0.81702600 | 4.02077700  | -2.58657300 |
| C | -0.41810000 | 3.75184900  | -3.90275500 |
| S | 0.72583600  | 2.41989600  | -4.20558800 |
| C | -1.63604900 | 5.12087700  | -2.32232100 |
| C | -2.05079500 | 5.94204800  | -3.37071400 |
| C | -1.67421100 | 5.66079000  | -4.68696100 |
| C | -0.85827200 | 4.56220400  | -4.95170100 |
| O | 2.10220300  | 2.97055800  | -4.05759400 |
| O | 0.42658900  | 1.79785200  | -5.51870600 |
| H | 4.84085000  | -1.32331200 | 3.15519400  |
| H | 2.89695800  | -2.54245800 | 4.02189600  |
| H | 2.46593300  | 0.17405900  | -0.09216600 |
| H | 4.63395000  | 0.05429600  | 1.08103300  |
| H | -2.09928400 | -3.72927800 | 3.48317300  |
| H | -4.16179600 | -3.46550100 | 2.18297100  |
| H | -4.17352000 | -2.04705900 | 0.12637900  |
| H | -2.09348700 | -0.91923500 | -0.58890500 |
| H | -0.16685000 | -1.11400800 | 4.51053900  |

|   |             |             |             |
|---|-------------|-------------|-------------|
| H | -0.73647900 | -2.73192100 | 4.95554000  |
| H | 0.97053100  | -2.32003100 | 5.13650700  |
| H | -0.09932600 | -4.77099000 | 3.51612300  |
| H | 0.92006300  | -4.56593200 | 2.08111000  |
| H | 1.60971700  | -4.36403400 | 3.70078400  |
| H | -0.48091500 | 1.60515600  | 0.41487000  |
| H | 0.72310000  | -0.49010800 | -3.96338900 |
| H | 0.70357400  | -1.88222700 | -1.91388500 |
| H | -1.93934400 | 5.30960900  | -1.29808000 |
| H | -2.68412500 | 6.79771400  | -3.15713900 |
| H | -2.01221900 | 6.29404000  | -5.50080000 |
| H | -0.55389900 | 4.31668600  | -5.96371400 |

AC-OSO-T<sub>1</sub>

|   |            |             |            |
|---|------------|-------------|------------|
| C | 3.88734600 | -1.24622800 | 2.61717300 |
| C | 2.78597900 | -1.94591300 | 3.10767100 |
| C | 1.54136600 | -1.90003900 | 2.47787700 |
| C | 1.42570200 | -1.11272600 | 1.29876000 |
| C | 2.54901400 | -0.39902700 | 0.80385800 |



|   |             |             |             |
|---|-------------|-------------|-------------|
| C | 3.76199600  | -0.46729700 | 1.45910000  |
| C | 0.36835100  | -2.68090500 | 3.05346500  |
| C | -0.89484900 | -2.48809600 | 2.22625700  |
| C | -0.92152300 | -1.68086600 | 1.05604300  |
| N | 0.22167300  | -1.02625100 | 0.60812700  |
| C | -2.08007500 | -3.12133900 | 2.60427100  |
| C | -3.25989500 | -2.97507400 | 1.87687600  |
| C | -3.27746800 | -2.17332200 | 0.72801000  |
| C | -2.12451100 | -1.53436100 | 0.31767500  |
| C | 0.09987600  | -2.19189300 | 4.50729700  |
| C | 0.73235300  | -4.19514600 | 3.07437800  |
| C | 0.15450700  | -0.23544300 | -0.60764000 |
| C | -0.17492100 | 1.15820800  | -0.51661600 |
| C | -0.10827600 | 1.92401200  | -1.65424400 |
| C | 0.23439100  | 1.36705200  | -2.92303100 |
| C | 0.51050500  | -0.05008200 | -2.99124200 |
| C | 0.48006100  | -0.81941100 | -1.85203300 |
| O | -0.44331600 | 3.26379700  | -1.50978200 |
| C | -0.81299200 | 4.02302300  | -2.59017400 |

|   |             |             |             |
|---|-------------|-------------|-------------|
| C | -0.40437000 | 3.75375100  | -3.90320600 |
| S | 0.73864300  | 2.41925500  | -4.19791500 |
| C | -1.63145100 | 5.12499200  | -2.33182600 |
| C | -2.03591800 | 5.94755400  | -3.38296700 |
| C | -1.64958500 | 5.66598500  | -4.69643800 |
| C | -0.83431100 | 4.56566500  | -4.95527700 |
| O | 2.11526000  | 2.96612100  | -4.03999400 |
| O | 0.44692000  | 1.79768000  | -5.51285900 |
| H | 4.83818300  | -1.30727400 | 3.13591800  |
| H | 2.90555300  | -2.54251200 | 4.00518400  |
| H | 2.43821000  | 0.19728300  | -0.08947000 |
| H | 4.61224100  | 0.08343200  | 1.07249200  |
| H | -2.08842300 | -3.74813900 | 3.48892200  |
| H | -4.16039000 | -3.48419400 | 2.20375900  |
| H | -4.19109800 | -2.05260700 | 0.15648500  |
| H | -2.11820900 | -0.91583900 | -0.56765900 |
| H | -0.16245100 | -1.13084400 | 4.51906800  |
| H | -0.72097500 | -2.75410400 | 4.95867700  |
| H | 0.98495700  | -2.33427200 | 5.13151300  |

|   |             |             |             |
|---|-------------|-------------|-------------|
| H | -0.08393500 | -4.78176400 | 3.50252500  |
| H | 0.92739500  | -4.56344000 | 2.06381600  |
| H | 1.62420600  | -4.36831900 | 3.68120400  |
| H | -0.51279500 | 1.60418400  | 0.41148600  |
| H | 0.72852300  | -0.49065600 | -3.95653900 |
| H | 0.69201800  | -1.88349300 | -1.90746900 |
| H | -1.94237500 | 5.31389700  | -1.30990400 |
| H | -2.66889000 | 6.80462800  | -3.17405200 |
| H | -1.97965800 | 6.30047200  | -5.51256200 |
| H | -0.52257700 | 4.31988900  | -5.96497900 |

ACRXTN-S<sub>0</sub>

|   |            |             |             |
|---|------------|-------------|-------------|
| C | 3.51219200 | -3.71742500 | -0.15298600 |
| C | 4.21142400 | -2.52304000 | -0.30559400 |
| C | 3.59991100 | -1.26744800 | -0.19170100 |
| C | 2.21772000 | -1.23028300 | 0.08623900  |
| C | 1.50676600 | -2.43720300 | 0.24116600  |
| C | 2.14703100 | -3.66499500 | 0.12334600  |
| C | 4.44393400 | -0.00010500 | -0.37946000 |
| C | 3.59996700 | 1.26732500  | -0.19200400 |

|   |             |             |             |
|---|-------------|-------------|-------------|
| C | 2.21777600  | 1.23027700  | 0.08596400  |
| N | 1.54310000  | 0.00002500  | 0.20771000  |
| C | 4.21153600  | 2.52286900  | -0.30615900 |
| C | 3.51236200  | 3.71731500  | -0.15379900 |
| C | 2.14720200  | 3.66500500  | 0.12257000  |
| C | 1.50688100  | 2.43727500  | 0.24065900  |
| C | 5.04408300  | -0.00029700 | -1.81196800 |
| C | 5.59835600  | -0.00002000 | 0.65928400  |
| C | 0.14179000  | 0.00009600  | 0.51243800  |
| C | -0.78554300 | -0.00011500 | -0.52380200 |
| C | -2.15064400 | -0.00001500 | -0.21704800 |
| C | -2.59704300 | 0.00031700  | 1.11388500  |
| C | -1.63935400 | 0.00053300  | 2.14292300  |
| C | -0.28506300 | 0.00042100  | 1.85393600  |
| O | -3.00813100 | -0.00021600 | -1.28003800 |
| C | -4.36033000 | -0.00022000 | -1.06159600 |
| C | -4.91568800 | 0.00009600  | 0.22824300  |
| C | -4.04289800 | 0.00041500  | 1.41772100  |
| C | -5.17151300 | -0.00053300 | -2.20101300 |

|   |             |             |             |
|---|-------------|-------------|-------------|
| C | -6.55108000 | -0.00052800 | -2.04446600 |
| C | -7.12982300 | -0.00022000 | -0.76382300 |
| C | -6.31613600 | 0.00008700  | 0.35751700  |
| O | -4.47928700 | 0.00071000  | 2.56841200  |
| H | 4.02571100  | -4.66873700 | -0.24910800 |
| H | 5.27411400  | -2.56714300 | -0.52293700 |
| H | 0.44603400  | -2.41175600 | 0.45532900  |
| H | 1.57235400  | -4.57799200 | 0.24864400  |
| H | 5.27422900  | 2.56687400  | -0.52349600 |
| H | 4.02591800  | 4.66858600  | -0.25013700 |
| H | 1.57258000  | 4.57806000  | 0.24770400  |
| H | 0.44616000  | 2.41192800  | 0.45487700  |
| H | 4.24979500  | -0.00017100 | -2.56410400 |
| H | 5.66802400  | 0.88301300  | -1.97697900 |
| H | 5.66766600  | -0.88387300 | -1.97690500 |
| H | 6.23393400  | 0.88222900  | 0.54182200  |
| H | 5.20145900  | 0.00032300  | 1.67859900  |
| H | 6.23363600  | -0.88254500 | 0.54230700  |
| H | -0.46458000 | -0.00035700 | -1.55908100 |

|   |             |             |             |
|---|-------------|-------------|-------------|
| H | -2.00051800 | 0.00078100  | 3.16564700  |
| H | 0.45677600  | 0.00057800  | 2.64503400  |
| H | -4.70639700 | -0.00077300 | -3.18062100 |
| H | -7.18584300 | -0.00077100 | -2.92522000 |
| H | -8.20955300 | -0.00022100 | -0.65672600 |
| H | -6.72676700 | 0.00033200  | 1.36155800  |

ACRXTN-S<sub>1</sub>

|   |             |             |             |
|---|-------------|-------------|-------------|
| C | -3.48786500 | 3.69561800  | -0.16372500 |
| C | -4.21432900 | 2.51640900  | -0.32067700 |
| C | -3.61935900 | 1.26001400  | -0.19818400 |
| C | -2.22905300 | 1.21464600  | 0.09764000  |
| C | -1.49135700 | 2.41732400  | 0.25520200  |
| C | -2.11759100 | 3.64015800  | 0.12469400  |
| C | -4.45373800 | 0.00009300  | -0.38432600 |
| C | -3.61940400 | -1.25990600 | -0.19850800 |
| C | -2.22909300 | -1.21466500 | 0.09731000  |
| N | -1.56978400 | -0.00004000 | 0.23924900  |
| C | -4.21442200 | -2.51624700 | -0.32132000 |

|   |             |             |             |
|---|-------------|-------------|-------------|
| C | -3.48799800 | -3.69552300 | -0.16469200 |
| C | -2.11771700 | -3.64018900 | 0.12371500  |
| C | -1.49143600 | -2.41741200 | 0.25453800  |
| C | -5.04939000 | 0.00028500  | -1.82379900 |
| C | -5.61186900 | -0.00001900 | 0.65662100  |
| C | -0.14477000 | -0.00010200 | 0.54675000  |
| C | 0.78529600  | 0.00005800  | -0.51984700 |
| C | 2.13697700  | -0.00000300 | -0.21962200 |
| C | 2.61738900  | -0.00023000 | 1.11755900  |
| C | 1.64128000  | -0.00038900 | 2.15628700  |
| C | 0.28310200  | -0.00032100 | 1.87789000  |
| O | 2.99512200  | 0.00016200  | -1.29362700 |
| C | 4.36211300  | 0.00016200  | -1.07410700 |
| C | 4.90316300  | -0.00005700 | 0.22631200  |
| C | 4.03171700  | -0.00029600 | 1.41040000  |
| C | 5.16720300  | 0.00038700  | -2.20704700 |
| C | 6.56060200  | 0.00040000  | -2.06082200 |
| C | 7.12516300  | 0.00019000  | -0.78223400 |
| C | 6.30552500  | -0.00003500 | 0.34441100  |

|   |             |             |             |
|---|-------------|-------------|-------------|
| O | 4.49220000  | -0.00055700 | 2.58684300  |
| H | -3.98739200 | 4.65295300  | -0.26652800 |
| H | -5.27280900 | 2.58279300  | -0.54509900 |
| H | -0.43611700 | 2.36044400  | 0.47725600  |
| H | -1.54463400 | 4.55246100  | 0.24673800  |
| H | -5.27290700 | -2.58253200 | -0.54574200 |
| H | -3.98756200 | -4.65281300 | -0.26773700 |
| H | -1.54479100 | -4.55254600 | 0.24550700  |
| H | -0.43619100 | -2.36062800 | 0.47659500  |
| H | -4.25498200 | 0.00036100  | -2.57469000 |
| H | -5.67228300 | -0.88305400 | -1.98277300 |
| H | -5.67224700 | 0.88368800  | -1.98255400 |
| H | -6.24305400 | -0.88265600 | 0.53084900  |
| H | -5.21950300 | -0.00015700 | 1.67687700  |
| H | -6.24302100 | 0.88267500  | 0.53107500  |
| H | 0.46433300  | 0.00022900  | -1.55527800 |
| H | 2.00715000  | -0.00056200 | 3.17618000  |
| H | -0.44653000 | -0.00043900 | 2.68265500  |
| H | 4.69842200  | 0.00054900  | -3.18584000 |



|   |            |             |             |
|---|------------|-------------|-------------|
| H | 7.19297100 | 0.00057500  | -2.94335000 |
| H | 8.20546300 | 0.00020400  | -0.66619900 |
| H | 6.71477700 | -0.00019500 | 1.34907600  |

ACRXTN-T<sub>1</sub>

|   |             |             |             |
|---|-------------|-------------|-------------|
| C | -3.48817400 | 3.69564400  | -0.16533700 |
| C | -4.21557500 | 2.51649600  | -0.31773200 |
| C | -3.62002000 | 1.26004200  | -0.19772400 |
| C | -2.22843800 | 1.21476400  | 0.09165300  |
| C | -1.48973300 | 2.41735900  | 0.24434600  |
| C | -2.11633400 | 3.64022700  | 0.11569600  |
| C | -4.45535900 | 0.00013200  | -0.37955800 |
| C | -3.62012000 | -1.25988100 | -0.19797700 |
| C | -2.22852800 | -1.21477300 | 0.09137600  |
| N | -1.56877900 | -0.00004500 | 0.23296200  |
| C | -4.21577700 | -2.51626200 | -0.31823200 |
| C | -3.48846300 | -3.69550000 | -0.16611500 |
| C | -2.11660600 | -3.64025000 | 0.11486900  |
| C | -1.48990600 | -2.41745800 | 0.24376400  |

|   |             |             |             |
|---|-------------|-------------|-------------|
| C | -5.05771100 | 0.00029500  | -1.81623100 |
| C | -5.60852100 | 0.00007600  | 0.66680700  |
| C | -0.14525700 | -0.00013100 | 0.54260100  |
| C | 0.78687300  | 0.00009400  | -0.52274600 |
| C | 2.13810400  | 0.00000200  | -0.22009100 |
| C | 2.61625300  | -0.00031600 | 1.11777100  |
| C | 1.63818400  | -0.00053400 | 2.15527800  |
| C | 0.28069800  | -0.00044100 | 1.87460800  |
| O | 2.99789900  | 0.00022800  | -1.29270600 |
| C | 4.36434900  | 0.00021500  | -1.07121100 |
| C | 4.90343300  | -0.00009300 | 0.22983700  |
| C | 4.02979900  | -0.00041500 | 1.41274400  |
| C | 5.17133000  | 0.00051700  | -2.20298100 |
| C | 6.56427400  | 0.00052000  | -2.05437300 |
| C | 7.12692600  | 0.00022400  | -0.77485500 |
| C | 6.30544700  | -0.00007700 | 0.35038500  |
| O | 4.48881700  | -0.00077400 | 2.58954000  |
| H | -3.98814100 | 4.65298300  | -0.26602200 |
| H | -5.27523400 | 2.58284700  | -0.53655500 |

|   |             |             |             |
|---|-------------|-------------|-------------|
| H | -0.43341600 | 2.36025200  | 0.46125900  |
| H | -1.54253600 | 4.55255100  | 0.23359700  |
| H | -5.27544800 | -2.58248300 | -0.53703700 |
| H | -3.98850900 | -4.65277800 | -0.26698600 |
| H | -1.54287300 | -4.55264400 | 0.23254100  |
| H | -0.43357500 | -2.36048000 | 0.46064500  |
| H | -4.26677300 | 0.00033500  | -2.57078300 |
| H | -5.68131900 | -0.88305600 | -1.97231200 |
| H | -5.68124500 | 0.88372800  | -1.97214300 |
| H | -6.24037500 | -0.88254100 | 0.54411100  |
| H | -5.21132100 | -0.00004100 | 1.68519400  |
| H | -6.24030200 | 0.88276900  | 0.54428600  |
| H | 0.46760200  | 0.00033200  | -1.55868200 |
| H | 2.00238700  | -0.00077200 | 3.17575900  |
| H | -0.45036900 | -0.00060300 | 2.67807100  |
| H | 4.70418300  | 0.00074500  | -3.18255100 |
| H | 7.19811600  | 0.00075400  | -2.93585500 |
| H | 8.20703200  | 0.00023100  | -0.65715900 |
| H | 6.71294500  | -0.00030300 | 1.35577100  |

## References

1. L. Wang, Q. Ou, Q. Peng and Z. Shuai, *J. Phys. Chem. A*, 2021, **125**, 1468-1475.
2. S. Y. Lee, C. Adachi and T. Yasuda, *Adv. Mater.*, 2016, **28**, 4626-4631.
3. H. Nakanotani, T. Higuchi, T. Furukawa, K. Masui, K. Morimoto, M. Numata, H. Tanaka, Y. Sagara, T. Yasuda and C. Adachi, *Nat. Commun.*, 2014, **5**, 4016.
